# Supplementary material
Source: Springer Nature journal article supplement (https://www.springermedizin.de/resource/supplementary/12875_2010_501_MOESM1_ESM.pdf/9434750)

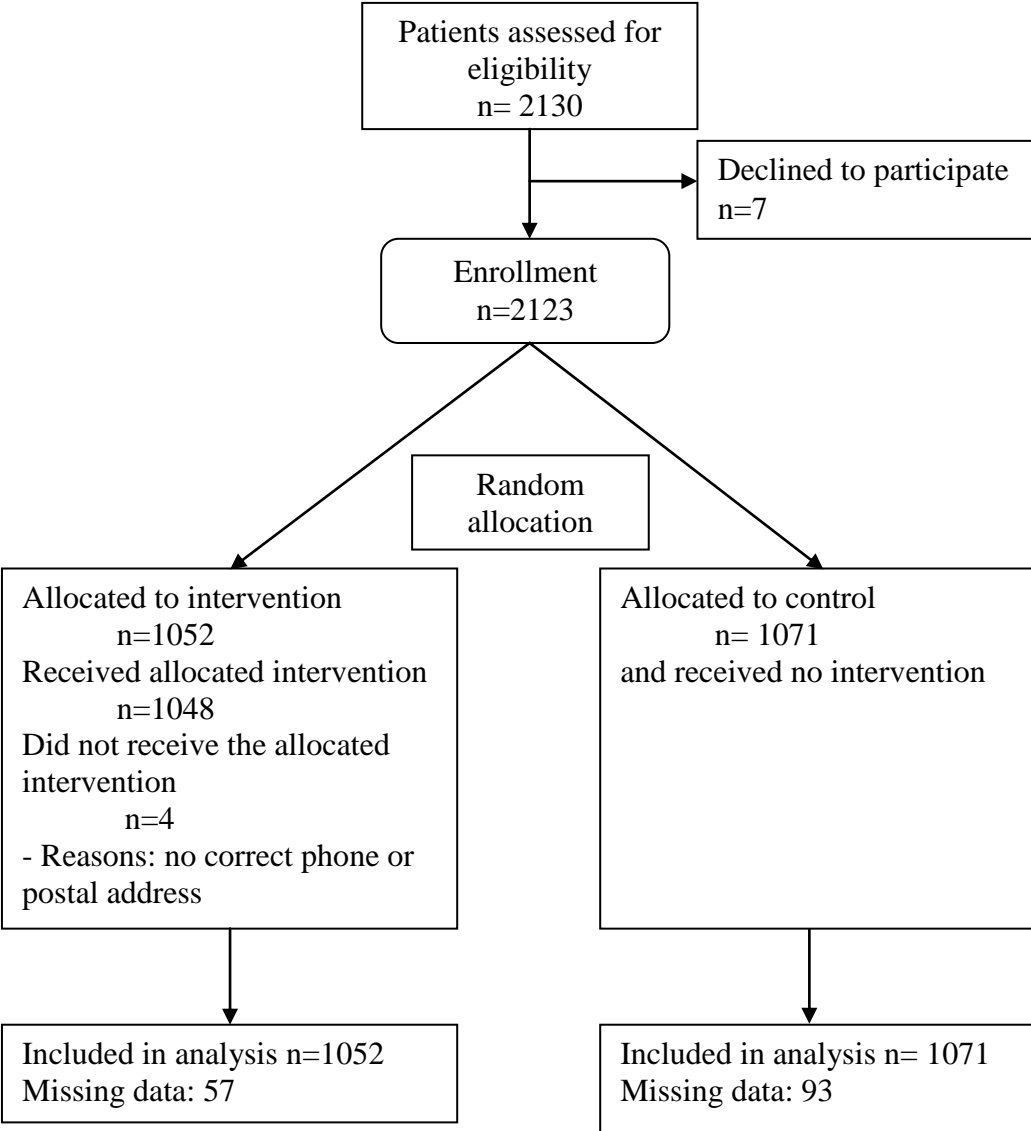

Supplement: MOESM1 [file 9434750]
